# Supplementary material
Source: PubMed Central journal article supplement (PMC4268488)
Supplement: NIHMS584020-supplement-S1.pdf [file NIHMS584020-supplement-S1.pdf]

## Supplementary Table S1. Primers Used for Cloning and Quantitative RT-PCR

### Cloning primers

| Gene           | Forward Primer                                     | Reverse Primer                               |
|----------------|----------------------------------------------------|----------------------------------------------|
| <i>miR-1</i>   | ATCGGAATTCAGCTAATCTCCGCACTG<br>GATCC               | ATCGGAATTCAGAGTATGGAAGTCATCCTCCTGGA          |
| <i>GJA1</i>    | ATCGGAGCTCTGTATGTGAATGAGCG<br>GGTGGT               | ATCGTCTAGAGCAATGAAGCTGAACATGACCGTAG          |
| <i>FRS2-wt</i> | ATCGGAGCTCCACCAGTGTGCCACAT<br>TTGCATTAG            | ATCGTCTAGAACAAGGGTGGGAAGGGATAGA              |
| <i>FRS2-mt</i> | TTATAACAATGCATATTTCTCTAATAA<br>AAAGACATAAGTGATACTG | GAGAAATATGCATTGTTTATAAAAAGAAATTAACCATGGGG    |
| <i>FZD7-wt</i> | ATCGGAGCTCCTGTGGAAAGGCATAA<br>CTGTGACGAA           | ATCGTCTAGACAACCCAACACACAGAGACA               |
| <i>FZD7-mt</i> | TTGAGATAAACAATGCTTTTTAAGGAA<br>AAGTGAAGAGCA        | TAAAAGCATTGTTTATCTCAACCAAAATTAACAACC<br>AACG |

### q-RT-PCR primers

| Gene            | Forward Primer                        | Reverse Primer                        |
|-----------------|---------------------------------------|---------------------------------------|
| <i>miR-1</i>    | TGGAATGTAAAGAAGTATGTAT                |                                       |
| <i>miR-1-2*</i> | ACATACTTCTTTATGTACCCATA               |                                       |
| <i>AFP</i>      | CCC GAA CTT TCC AAG CCA TA            | TAC ATG GGC CAC ATC CAG G             |
| <i>CTNT</i>     | AAA GCC CAG GTC GTT CAT GCC C         | CAT TCC GGA TGC GCT GCT GC            |
| <i>FOXA2</i>    | GCA TTC CCA ATC TTG ACA CGG TGA       | GCC CTT GCA GCC AGA ATA CAC ATT       |
| <i>FRS2</i>     | GAG CAG TGG TAT AGG TGT GCA<br>GTT TC | TGT TCT GCC TTG ACT GGC TGT TTC       |
| <i>FZD7</i>     | TGT CTC TGT GTG GTT GGG TTG G         | GGA GGG TAG TGT CAA AGG TGG GAT AAA G |
| <i>GAPDH</i>    | AGCCACATCGCTCAGACAC                   | GCCCAATACGACCAATCC                    |
| <i>GATA4</i>    | GGAAGCCCAAGAACCTGAAT                  | GTTGCTGGAGTTGCTGGAA                   |
| <i>ISL1</i>     | TTG TAC GGG ATC AAA TGC GCC<br>AAG    | AGG CCA CAC AGC GGA AAC A             |
| <i>MESPI</i>    | GATGGAGCCAAGCCAC                      | TCAGTTGTCCCTTGTCACCTG                 |
| <i>MYH6</i>     | GGG ATA ACC AGG GGA AGC ACC<br>AAG A  | TGC CTC CCT CCC GGG ACA AAA T         |
| <i>MYH7</i>     | TTG AGT AGC CCA GGC ACA GCC AT        | TGC CAC CCT CTC GAG ACA CGA T         |
| <i>NANOG</i>    | TGA ACC TCA GCT ACA AAC AGG TG        | AAC TGC ATG CAG GAC TGC AGA G         |
| <i>NKX2.5</i>   | ACC TCA ACA GCT CCC TGA CTC T         | ATA ATC GCC GCC ACA AAC TCT CC        |
| <i>OCT4</i>     | AAC CTG GAG TTT GTG CCA GGG TTT       | TGA ACT TCA CCT TCC CTC CAA CCA       |
| <i>PAX6</i>     | TCG AAG GGC CAA ATG GAG AAG<br>AGA AG | GGT GGG TTG TGG AAT TGG TTG GTA GA    |
| <i>SOX1</i>     | CCT GTG TGT ACC CTG GAG TTT CTG<br>T  | TGC ACG AAG CAC CTG CAA TAA GAT G     |
| <i>SOX2</i>     | CGC CCC CAG CAG ACT TCA CA            | CTC CTC TTT TGC ACC CCT CCC ATT T     |
| <i>SOX17</i>    | AGG AAA TCC TCA GAC TCC TGG GTT       | CCC AAA CTG TTC AAG TGG CAG ACA       |

*T*

CAG TGG CAG TCT CAG GTT AAG AAG GA

CGC TAC TGC AGG TGT GAG CAA
